# Supplementary material for: Ordered, Random, Monotonic and Non-Monotonic Digital Nanodot Gradients
Source: PubMed Central journal article supplement (PMC4156346; doi:10.1371/journal.pone.0106541), 2014-09-05
Supplement: pone.0106541.s004.pdf [file pone.0106541.s004.pdf]

Supplementary Table 1

| #  | function           | O/R | min (%) | max (%) | #   | function    | O/R | min (%) | max (%) |
|----|--------------------|-----|---------|---------|-----|-------------|-----|---------|---------|
| 1  | linear             | O   | 0.02    | 44.44   | 51  | sin_pluslin | R   | 0.02    | 43.96   |
| 2  | linear             | O   | 0.02    | 28.03   | 52  | sin_pluslin | R   | 0.02    | 44.04   |
| 3  | linear             | O   | 0.02    | 19.27   | 53  | sin_pluslin | R   | 0.02    | 43.96   |
| 4  | linear             | O   | 0.02    | 14.06   | 54  | sin_pluslin | R   | 0.02    | 44.01   |
| 5  | linear             | O   | 0.02    | 10.71   | 55  | sin_pluslin | R   | 0.02    | 44.08   |
| 6  | linear             | O   | 0.02    | 8.43    | 56  | sin_pluslin | R   | 0.02    | 44.14   |
| 7  | linear             | O   | 0.02    | 6.81    | 57  | sin_pluslin | R   | 0.02    | 44.05   |
| 8  | linear             | O   | 0.02    | 5.61    | 58  | sin_pluslin | R   | 0.02    | 44.10   |
| 9  | linear             | O   | 0.02    | 4.70    | 59  | sin_pluslin | R   | 0.02    | 44.15   |
| 10 | linear             | O   | 0.02    | 4.00    | 60  | sin_pluslin | R   | 0.02    | 44.20   |
| 11 | exponential        | O   | 0.02    | 44.44   | 61  | sin_plusexp | R   | 0.02    | 41.58   |
| 12 | exponential        | O   | 0.02    | 28.03   | 62  | sin_plusexp | R   | 0.02    | 41.86   |
| 13 | exponential        | O   | 0.02    | 19.27   | 63  | sin_plusexp | R   | 0.02    | 42.21   |
| 14 | exponential        | O   | 0.02    | 14.06   | 64  | sin_plusexp | R   | 0.02    | 42.58   |
| 15 | exponential        | O   | 0.02    | 10.71   | 65  | sin_plusexp | R   | 0.02    | 42.95   |
| 16 | exponential        | O   | 0.02    | 8.43    | 66  | sin_plusexp | R   | 0.02    | 43.12   |
| 17 | exponential        | O   | 0.02    | 6.81    | 67  | sin_plusexp | R   | 0.02    | 43.30   |
| 18 | exponential        | O   | 0.02    | 5.61    | 68  | sin_plusexp | R   | 0.02    | 43.49   |
| 19 | exponential        | O   | 0.02    | 4.70    | 69  | sin_plusexp | R   | 0.02    | 43.43   |
| 20 | exponential        | O   | 0.02    | 4.00    | 70  | sin_plusexp | R   | 0.02    | 43.55   |
| 21 | sin_linamp         | R   | 0.02    | 43.34   | 71  | sin_plusexp | R   | 0.02    | 43.68   |
| 22 | sin_linamp         | R   | 0.02    | 43.89   | 72  | sin_plusexp | R   | 0.02    | 43.81   |
| 23 | sin_linamp         | R   | 0.02    | 44.17   | 73  | sin_plusexp | R   | 0.02    | 43.68   |
| 24 | sin_linamp         | R   | 0.02    | 10.44   | 74  | sin_plusexp | R   | 0.02    | 43.77   |
| 25 | sin_linamp         | R   | 0.02    | 10.58   | 75  | sin_plusexp | R   | 0.02    | 43.87   |
| 26 | sin_linamp         | R   | 0.02    | 10.64   | 76  | sin_plusexp | R   | 0.02    | 43.96   |
| 27 | sin_linamp         | R   | 0.02    | 4.82    | 77  | sin_plusexp | R   | 0.02    | 43.83   |
| 28 | sin_linamp         | R   | 0.02    | 4.88    | 78  | sin_plusexp | R   | 0.02    | 43.90   |
| 29 | sin_linamp         | R   | 0.02    | 4.91    | 79  | sin_plusexp | R   | 0.02    | 43.98   |
| 30 | sin_linamp         | R   | 0.02    | 2.74    | 80  | sin_plusexp | R   | 0.02    | 44.06   |
| 31 | sinusoidal         | R   | 0.02    | 10.02   | 81  | linear      | R   | 0.02    | 44.44   |
| 32 | sinusoidal         | R   | 0.02    | 15.02   | 82  | linear      | R   | 0.02    | 28.03   |
| 33 | sinusoidal         | R   | 0.02    | 20.02   | 83  | linear      | R   | 0.02    | 19.27   |
| 34 | sinusoidal         | R   | 0.02    | 15.02   | 84  | linear      | R   | 0.02    | 14.06   |
| 35 | sin_pluslin_linamp | R   | 0.02    | 23.25   | 85  | linear      | R   | 0.02    | 10.71   |
| 36 | sin_pluslin_linamp | R   | 0.02    | 23.69   | 86  | linear      | R   | 0.02    | 8.43    |
| 37 | sin_plusexp_expamp | R   | 0.02    | 24.21   | 87  | linear      | R   | 0.02    | 6.81    |
| 38 | sin_plusexp_expamp | R   | 0.02    | 24.04   | 88  | linear      | R   | 0.02    | 5.61    |
| 39 | sin_plusexp_expamp | R   | 0.02    | 25.08   | 89  | linear      | R   | 0.02    | 4.70    |
| 40 | sin_plusexp_expamp | R   | 0.02    | 24.99   | 90  | linear      | R   | 0.02    | 4.00    |
| 41 | sin_pluslin        | R   | 0.02    | 42.55   | 91  | exponential | R   | 0.02    | 44.44   |
| 42 | sin_pluslin        | R   | 0.02    | 42.75   | 92  | exponential | R   | 0.02    | 28.03   |
| 43 | sin_pluslin        | R   | 0.02    | 42.99   | 93  | exponential | R   | 0.02    | 19.27   |
| 44 | sin_pluslin        | R   | 0.02    | 43.23   | 94  | exponential | R   | 0.02    | 14.06   |
| 45 | sin_pluslin        | R   | 0.02    | 43.48   | 95  | exponential | R   | 0.02    | 10.71   |
| 46 | sin_pluslin        | R   | 0.02    | 43.59   | 96  | exponential | R   | 0.02    | 8.43    |
| 47 | sin_pluslin        | R   | 0.02    | 43.71   | 97  | exponential | R   | 0.02    | 6.81    |
| 48 | sin_pluslin        | R   | 0.02    | 43.83   | 98  | exponential | R   | 0.02    | 5.61    |
| 49 | sin_pluslin        | R   | 0.02    | 43.80   | 99  | exponential | R   | 0.02    | 4.70    |
| 50 | sin_pluslin        | R   | 0.02    | 43.87   | 100 | exponential | R   | 0.02    | 4.00    |

Legend

O/R

sin\_linamp or sin\_expamp  
 sin\_pluslin or sin\_plusexp  
 sin\_pluslin\_linamp  
 sin\_plusexp\_expamp

Ordered/Random

Sinusoid with linearly or exponentially increasing amplitude  
 Sinusoid plus a linear or exponential average trend  
 Sinusoid with linearly increasing amplitude and linear average trend  
 Sinusoid with exponentially increasing amplitude and exponential average trend
